# Supplementary material for: Negative Life Events and Emotional Symptoms From Ages 2 to 30 Years
Source: PubMed Central journal article supplement (PMC11362870; doi:10.1001/jamanetworkopen.2024.29448), 2024-08-29
Supplement: jamanetwopen-e2429448-s001.pdf [file jamanetwopen-e2429448-s001.pdf]

## Supplemental Online Content

Copeland WE, Keen R, Tong G, Shanahan L. Negative life events and emotional symptoms from ages 2 to 30 years. *JAMA Netw. Open.* 2024;7(8):e2429448. doi:10.1001/jamanetworkopen.2024.29448

**eTable 1.** List of Stressful and Traumatic Events

**eTable 2.** Comparison of Event-Depressive Symptoms Associations Between Developmental Period Groups

**eTable 3.** Comparison of Event-Anxiety Symptoms Associations Between Developmental Period Groups

**eTable 4.** Comparison of Event-Impairment Associations Between Developmental Period Groups

**eTable 5.** Comparison of Event-Symptoms Associations Between Developmental Period Groups For Females (Includes All Samples)

**eTable 6.** Comparison of Event-Symptoms Associations Between Developmental Groups for Males

**eTable 7.** Follow-Up Model Testing Additive and Interactive Effects of Traumatic and Stressful Events

This supplemental material has been provided by the authors to give readers additional information about their work.

| <b>eTable 1. List of Stressful and Traumatic Events</b> |                                            |
|---------------------------------------------------------|--------------------------------------------|
| <b>Lifetime Traumatic Events</b>                        | <b>3-month Stressful Events</b>            |
| Death of a close relative or friend                     | New child in home                          |
| Witness to a traumatic event                            | Pregnancy                                  |
| Diagnosis with a life-threatening illness               | Parental separation                        |
| Serious accident                                        | Parental divorce                           |
| Fire                                                    | New parental figure                        |
| Exposure to life-threatening toxic agent                | Moving                                     |
| Learning of a traumatic event                           | Change of school/work other than promotion |
| War or terrorism                                        | Loss of best friend through move           |
| Cause of death or serious harm                          | Break-up with best friend                  |
| Victim of physical violence                             | Break-up with boy/girlfriend/spouse        |
| Victim of physical abuse                                | Parental arrest                            |
| Kidnapping or captivity                                 | Reduction in standard of living            |
| Sexual abuse                                            | Forced separation from home                |
| Rape                                                    | Death of pet*                              |

\* Death of pet was only included in stressful events for preschoolers.

| <b>eTable 2.</b> Comparison of Event-Depressive Symptoms Associations Between Developmental Period Groups |           |           |             |                  |
|-----------------------------------------------------------------------------------------------------------|-----------|-----------|-------------|------------------|
|                                                                                                           | Preschool | Childhood | Adolescence | Late adolescence |
| <b>Stressful Events</b>                                                                                   | <i>p</i>  | <i>p</i>  | <i>p</i>    | <i>p</i>         |
| Preschool                                                                                                 | --        |           |             |                  |
| Childhood                                                                                                 | 0.36      | --        |             |                  |
| Adolescence                                                                                               | 0.51      | 0.61      | --          |                  |
| Late adolescence                                                                                          | 0.81      | 0.18      | 0.23        | --               |
| Young Adulthood                                                                                           | 0.02      | 0.0002*   | 0.0004*     | 0.02             |
| <b>Traumatic Events</b>                                                                                   |           |           |             |                  |
| Preschool                                                                                                 | --        |           |             |                  |
| Childhood                                                                                                 | 0.39      | --        |             |                  |
| Adolescence                                                                                               | 0.37      | 0.91      | --          |                  |
| Late adolescence                                                                                          | 0.50      | 0.74      | 0.67        | --               |
| Young Adulthood                                                                                           | 0.49      | 0.96      | 0.91        | 0.88             |

\* Significance reached with Bonferroni-corrected alpha. *Preschool* includes participants < 7 years old, *childhood* includes those ≥ 7 to < 13 years old, *adolescence* includes those ages ≥ 13 to < 18 years old, *late adolescence* includes those ages ≥ 18 to < 23 years old, and *young adulthood* includes those ≥ 23 to 30 years old.

| <b>eTable 3. Comparison of Event-Anxiety Symptoms Associations Between Developmental Period Groups</b> |           |           |             |                  |
|--------------------------------------------------------------------------------------------------------|-----------|-----------|-------------|------------------|
|                                                                                                        | Preschool | Childhood | Adolescence | Late adolescence |
| <b>Stressful Events</b>                                                                                | <i>p</i>  | <i>p</i>  | <i>p</i>    | <i>p</i>         |
| Preschool                                                                                              | --        |           |             |                  |
| Childhood                                                                                              | 0.33      | --        |             |                  |
| Adolescence                                                                                            | 0.22      | 0.83      | --          |                  |
| Late adolescence                                                                                       | 0.07      | 0.30      | 0.42        | --               |
| Young Adulthood                                                                                        | 0.0001*   | 0.001*    | 0.003       | 0.04             |
| <b>Traumatic Events</b>                                                                                |           |           |             |                  |
| Preschool                                                                                              | --        |           |             |                  |
| Childhood                                                                                              | 0.50      | --        |             |                  |
| Adolescence                                                                                            | 0.07      | 0.14      | --          |                  |
| Late adolescence                                                                                       | 0.63      | 0.85      | 0.13        | --               |
| Young Adulthood                                                                                        | 0.71      | 0.89      | 0.32        | 0.99             |

\* Significance reached with Bonferroni-corrected alpha. *Preschool* includes participants < 7 years old, *childhood* includes those ≥ 7 to < 13 years old, *adolescence* includes those ages ≥ 13 to < 18 years old, *late adolescence* includes those ages ≥ 18 to < 23 years old, and *young adulthood* includes those ≥ 23 to 30 years old.

| <b>eTable 4.</b> Comparison of Event-Impairment Associations Between Developmental Period Groups |           |           |             |                  |
|--------------------------------------------------------------------------------------------------|-----------|-----------|-------------|------------------|
|                                                                                                  | Preschool | Childhood | Adolescence | Late adolescence |
| <b>Stressful Events</b>                                                                          | <i>p</i>  | <i>p</i>  | <i>p</i>    | <i>p</i>         |
| Preschool                                                                                        | --        |           |             |                  |
| Childhood                                                                                        | 0.02      | --        |             |                  |
| Adolescence                                                                                      | 0.009     | 0.82      | --          |                  |
| Late adolescence                                                                                 | 0.07      | 0.79      | 0.66        | --               |
| Young Adulthood                                                                                  | 0.03      | 0.21      | 0.22        | 0.17             |
| <b>Traumatic Events</b>                                                                          |           |           |             |                  |
| Preschool                                                                                        | --        |           |             |                  |
| Childhood                                                                                        | 0.36      | --        |             |                  |
| Adolescence                                                                                      | 0.22      | 0.55      | --          |                  |
| Late adolescence                                                                                 | 0.50      | 0.64      | 0.27        | --               |
| Young Adulthood                                                                                  | 0.42      | 0.82      | 0.99        | 0.67             |

\* Significance reached with Bonferroni-corrected alpha. *Preschool* includes participants < 7 years old, *childhood* includes those ≥7 to < 13 years old, *adolescence* includes those ages ≥ 13 to < 18 years old, *late adolescence* includes those ages ≥ 18 to < 23 years old, and *young adulthood* includes those ≥ 23 to 30 years old.

| <b>eTable 5.</b> Comparison of Event-Symptoms Associations Between Developmental Period Groups For Females (Includes All Samples) |           |           |             |                  |
|-----------------------------------------------------------------------------------------------------------------------------------|-----------|-----------|-------------|------------------|
|                                                                                                                                   | Preschool | Childhood | Adolescence | Late adolescence |
| <b>Stressful Events</b>                                                                                                           | <i>p</i>  | <i>p</i>  | <i>p</i>    | <i>p</i>         |
| Preschool                                                                                                                         | --        |           |             |                  |
| Childhood                                                                                                                         | 0.78      | --        |             |                  |
| Adolescence                                                                                                                       | 0.62      | 0.86      | --          |                  |
| Late adolescence                                                                                                                  | 0.15      | 0.23      | 0.14        | --               |
| Young Adulthood                                                                                                                   | 0.002*    | 0.004     | 0.003       | 0.10             |
| <b>Traumatic Events</b>                                                                                                           |           |           |             |                  |
| Preschool                                                                                                                         | --        |           |             |                  |
| Childhood                                                                                                                         | 0.77      | --        |             |                  |
| Adolescence                                                                                                                       | 0.84      | 0.49      | --          |                  |
| Late adolescence                                                                                                                  | 0.40      | 0.46      | 0.14        | --               |
| Young Adulthood                                                                                                                   | 0.76      | 0.92      | 0.63        | 0.67             |

\* Significance reached with Bonferroni-corrected alpha. *Preschool* includes participants < 7 years old, *childhood* includes those ≥ 7 to < 13 years old, *adolescence* includes those ages ≥ 13 to < 18 years old, *late adolescence* includes those ages ≥ 18 to < 23 years old, and *young adulthood* includes those ≥ 23 to 30 years old.

**eTable 6.** Comparison of Event-Symptoms Associations Between Developmental Groups for Males

|                         | Preschool | Childhood | Adolescence | Late adolescence |
|-------------------------|-----------|-----------|-------------|------------------|
| <b>Stressful Events</b> | <i>p</i>  | <i>p</i>  | <i>p</i>    | <i>p</i>         |
| Preschool               | --        |           |             |                  |
| Childhood               | 0.63      | --        |             |                  |
| Adolescence             | 0.71      | 0.88      | --          |                  |
| Late adolescence        | 0.71      | 0.99      | 0.91        | --               |
| Young Adulthood         | 0.07      | 0.10      | 0.10        | 0.15             |
| <b>Traumatic Events</b> |           |           |             |                  |
| Preschool               | --        |           |             |                  |
| Childhood               | 0.58      | --        |             |                  |
| Adolescence             | 0.39      | 0.69      | --          |                  |
| Late adolescence        | 0.16      | 0.18      | 0.36        | --               |
| Young Adulthood         | 0.90      | 0.69      | 0.46        | 0.20             |

\* Significance reached with Bonferroni-corrected alpha. *Preschool* includes participants < 7 years old, *childhood* includes those ≥ 7 to < 13 years old, *adolescence* includes those ages ≥ 13 to < 18 years old, *late adolescence* includes those ages ≥ 18 to < 23 years old, and *young adulthood* includes those ≥ 23 to 30 years old.

**eTable 7. Follow-Up Model Testing Additive and Interactive Effects of Traumatic and Stressful Events**

|                  | Traumatic events |           | Stressful events |           | Interaction |           |
|------------------|------------------|-----------|------------------|-----------|-------------|-----------|
|                  | <i>B</i>         | <i>SE</i> | <i>B</i>         | <i>SE</i> | <i>B</i>    | <i>SE</i> |
| Preschool        | --               | --        | --               | --        | --          | --        |
| Childhood        | 0.22*            | 0.05*     | 0.15             | 0.06      | 0.02        | 0.03      |
| Adolescence      | 0.29*            | 0.05*     | 0.23*            | 0.06*     | -0.05       | 0.14      |
| Late adolescence | 0.24*            | 0.07*     | 0.30*            | 0.09*     | -0.04       | 0.04      |
| Young Adulthood  | 0.36*            | 0.08*     | 0.78*            | 0.16*     | -0.22       | 0.12      |

\* Significance reached with Bonferroni-corrected alpha. *Preschool* includes participants < 7 years old, *childhood* includes those  $\geq 7$  to < 13 years old, *adolescence* includes those ages  $\geq 13$  to < 18 years old, *late adolescence* includes those ages  $\geq 18$  to < 23 years old, and *young adulthood* includes those  $\geq 23$  to 30 years old.
