# Supplementary material for: Negative Life Events and Emotional Symptoms From Ages 2 to 30 Years
Source: PubMed Central journal article supplement (PMC11362870; doi:10.1001/jamanetworkopen.2024.29448), 2024-08-29
Supplement: jamanetwopen-e2429448-s002.pdf [file jamanetwopen-e2429448-s002.pdf]

## Data Sharing Statement

Copeland. Negative Life Events and Emotional Symptoms From Ages 2 to 30 Years. *JAMA Netw Open*. Published August 29, 2024. doi:10.1001/jamanetworkopen.2024.29448

### Data

**Data available:** Yes

**Data types:** Deidentified participant data

**How to access data:** For data-sharing requests, please contact Bill Copeland ([william.copeland@med.uvm.edu](mailto:william.copeland@med.uvm.edu))

**When available:** With publication

### Supporting Documents

**Document types:** None

### Additional Information

**Who can access the data:** Researchers whose proposed use of the data has been approved

**Types of analyses:** For any purpose

**Mechanisms of data availability:** After approval of a proposal
